# Supplementary material for: Improved representation of soil moisture processes through incorporation of cosmic-ray neutron count measurements in a large-scale hydrologic model
Source: Copernicus journal article supplement (doi:10.5194/hess-28-5419-2024), 2024-12-17
Supplement: Supplementary file 1 [file hess-28-5419-2024-supplement.pdf]

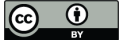

*Supplement of*

## **Improved representation of soil moisture processes through incorporation of cosmic-ray neutron count measurements in a large-scale hydrologic model**

**Eshrat Fatima et al.**

*Correspondence to:* Eshrat Fatima ([eshrat.fatima@uni-potsdam.de](mailto:eshrat.fatima@uni-potsdam.de)), Rohini Kumar ([rohini.kumar@ufz.de](mailto:rohini.kumar@ufz.de)), and Martin Schrön ([martin.schroen@ufz.de](mailto:martin.schroen@ufz.de))

The copyright of individual parts of the supplement might differ from the article licence.

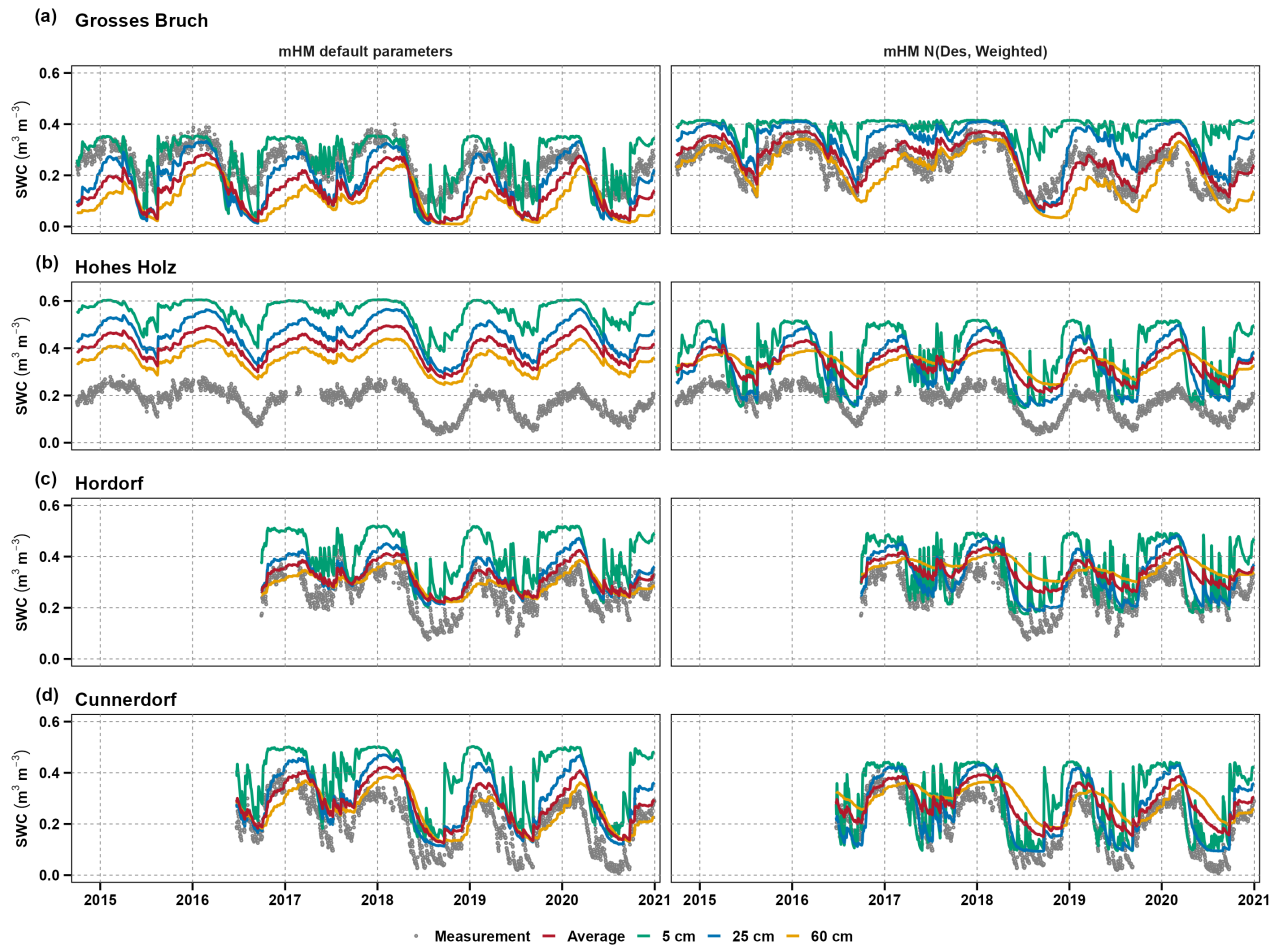

**Figure S1.** Soil water content at different land cover sites measured by the CRNS sensor network (dotted grey) and simulated by mHM at different depths (0–5 cm) in green, (0–25 cm) in blue, (0–60 cm) in yellow. The calibration is based on observed neutron counts for the  $N_{Des,w}$  method.

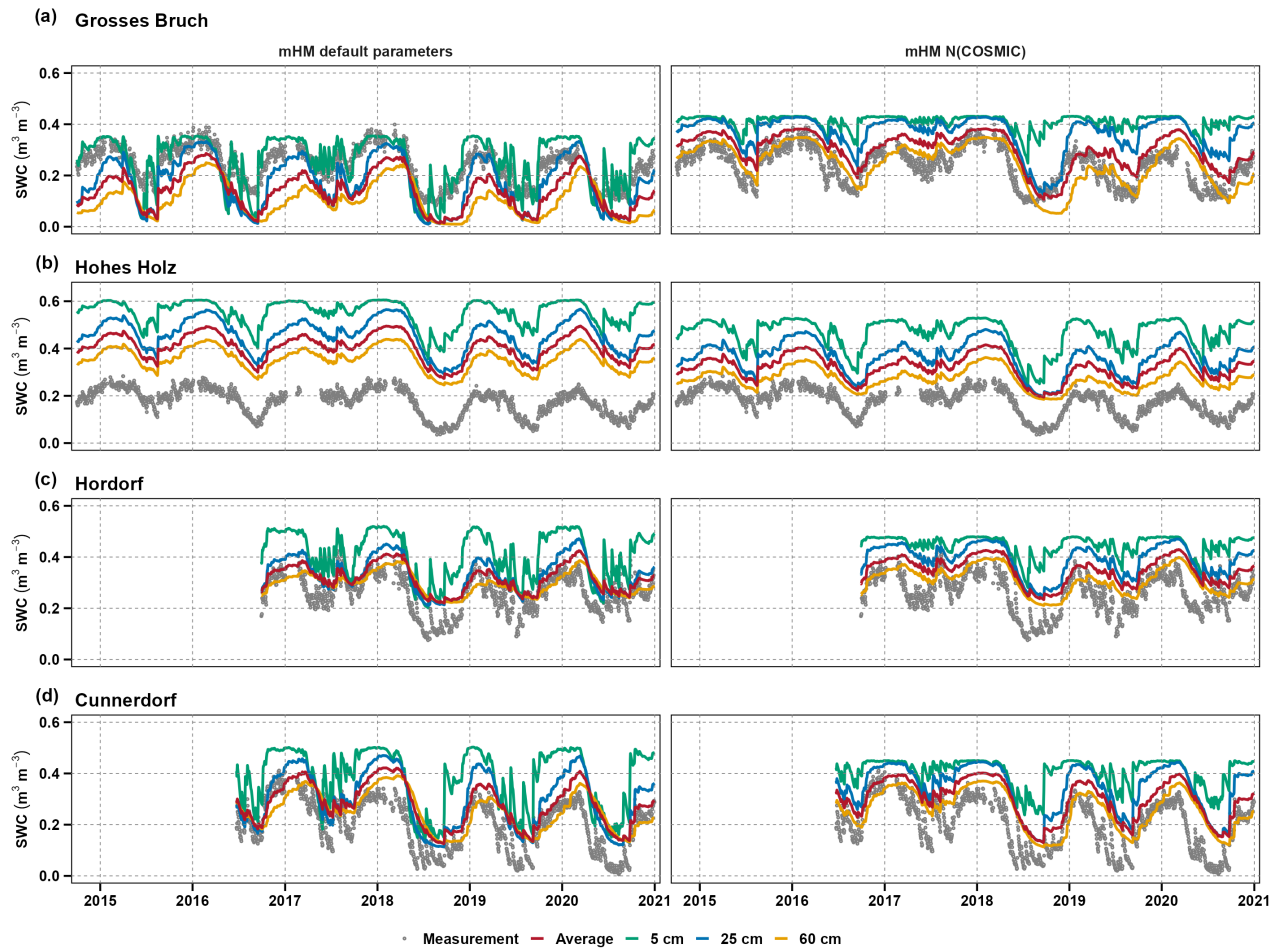

**Figure S2.** Soil water content at different land cover sites measured by the CRNS sensor network (dotted grey) and simulated by mHM at different depths (0–5 cm) in green, (0–25 cm) in blue, (0–60 cm) in yellow. The calibration is based on observed neutron counts for the  $N_{\text{COSMIC}}$  method.

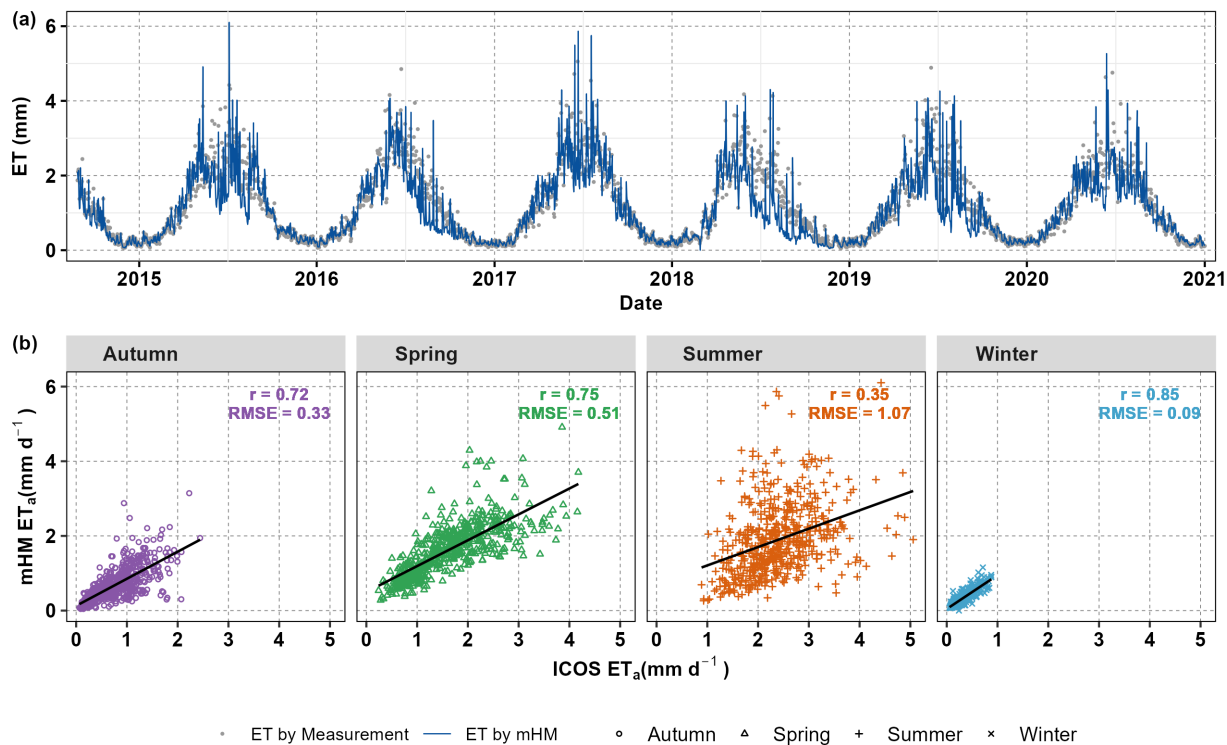

**Figure S3.** Correlations between observed and simulated evapotranspiration between different seasons. The correlation coefficients ( $r$  values) for each season are as follows: autumn [SON] ( $r = 0.79$ ), spring [MAM] ( $r = 0.77$ ), summer [JJA] ( $r = 0.42$ ), and winter [DJF] ( $r = 0.87$ ).

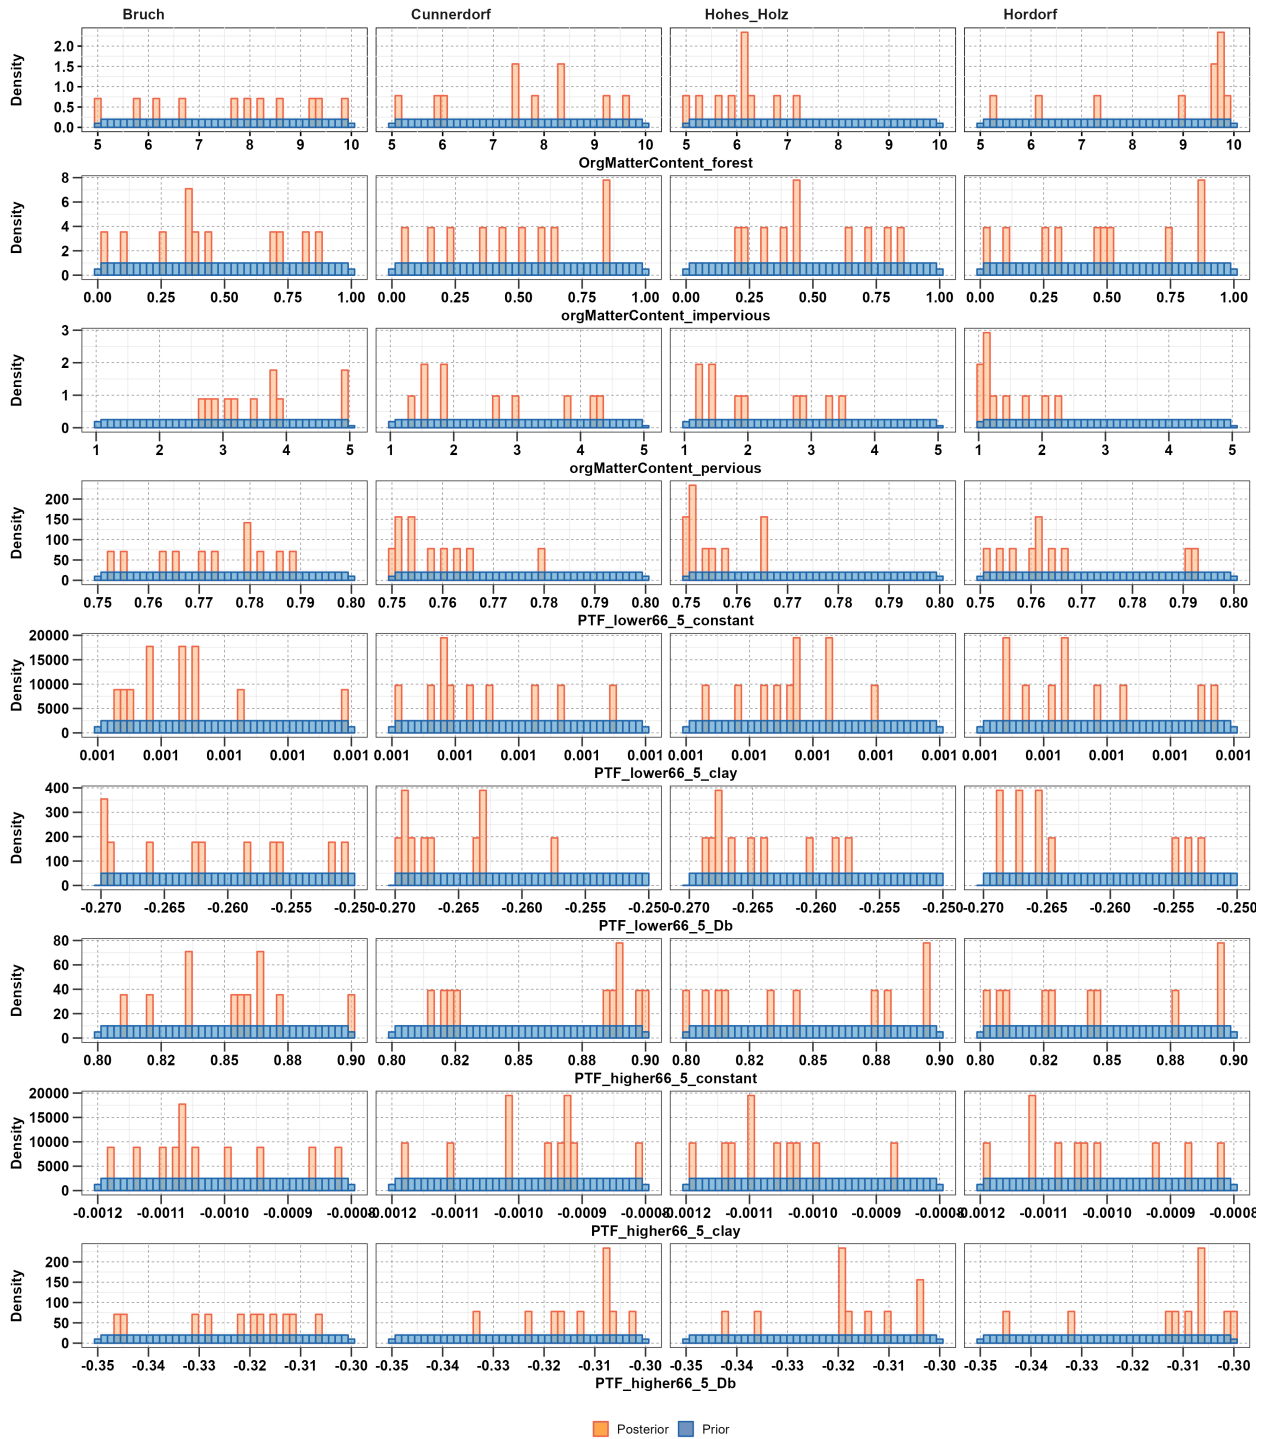

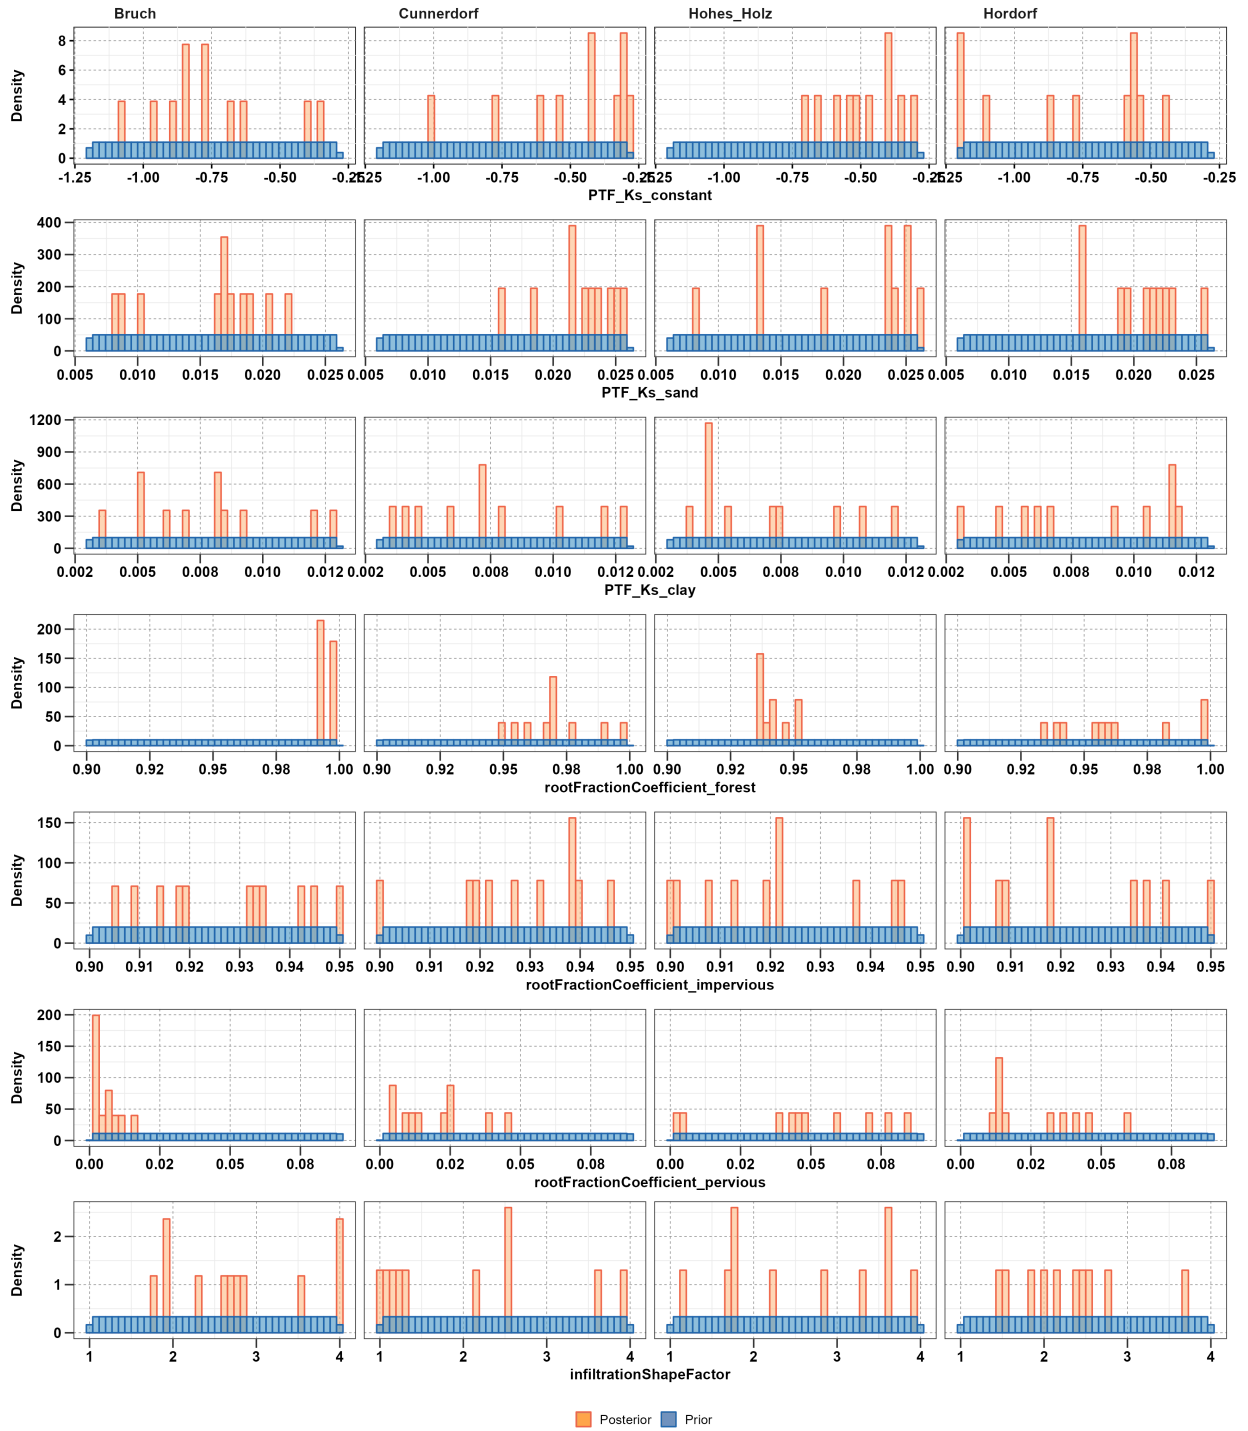

**Figure S5.** Probability Density Function (PDF) for seven parameters (soil moisture module) of the mHM taken from the three methods, namely  $N_{Des,U}$ ,  $N_{Des,W}$  and  $N_{COSMIC}$  (see Table 4). The prior PDF of the original sample, consisting of LHS 100 000 data points, is represented by the blue color. The behavioral PDF LHS 10, obtained after applying the objective function, is shown in orange for four sites.

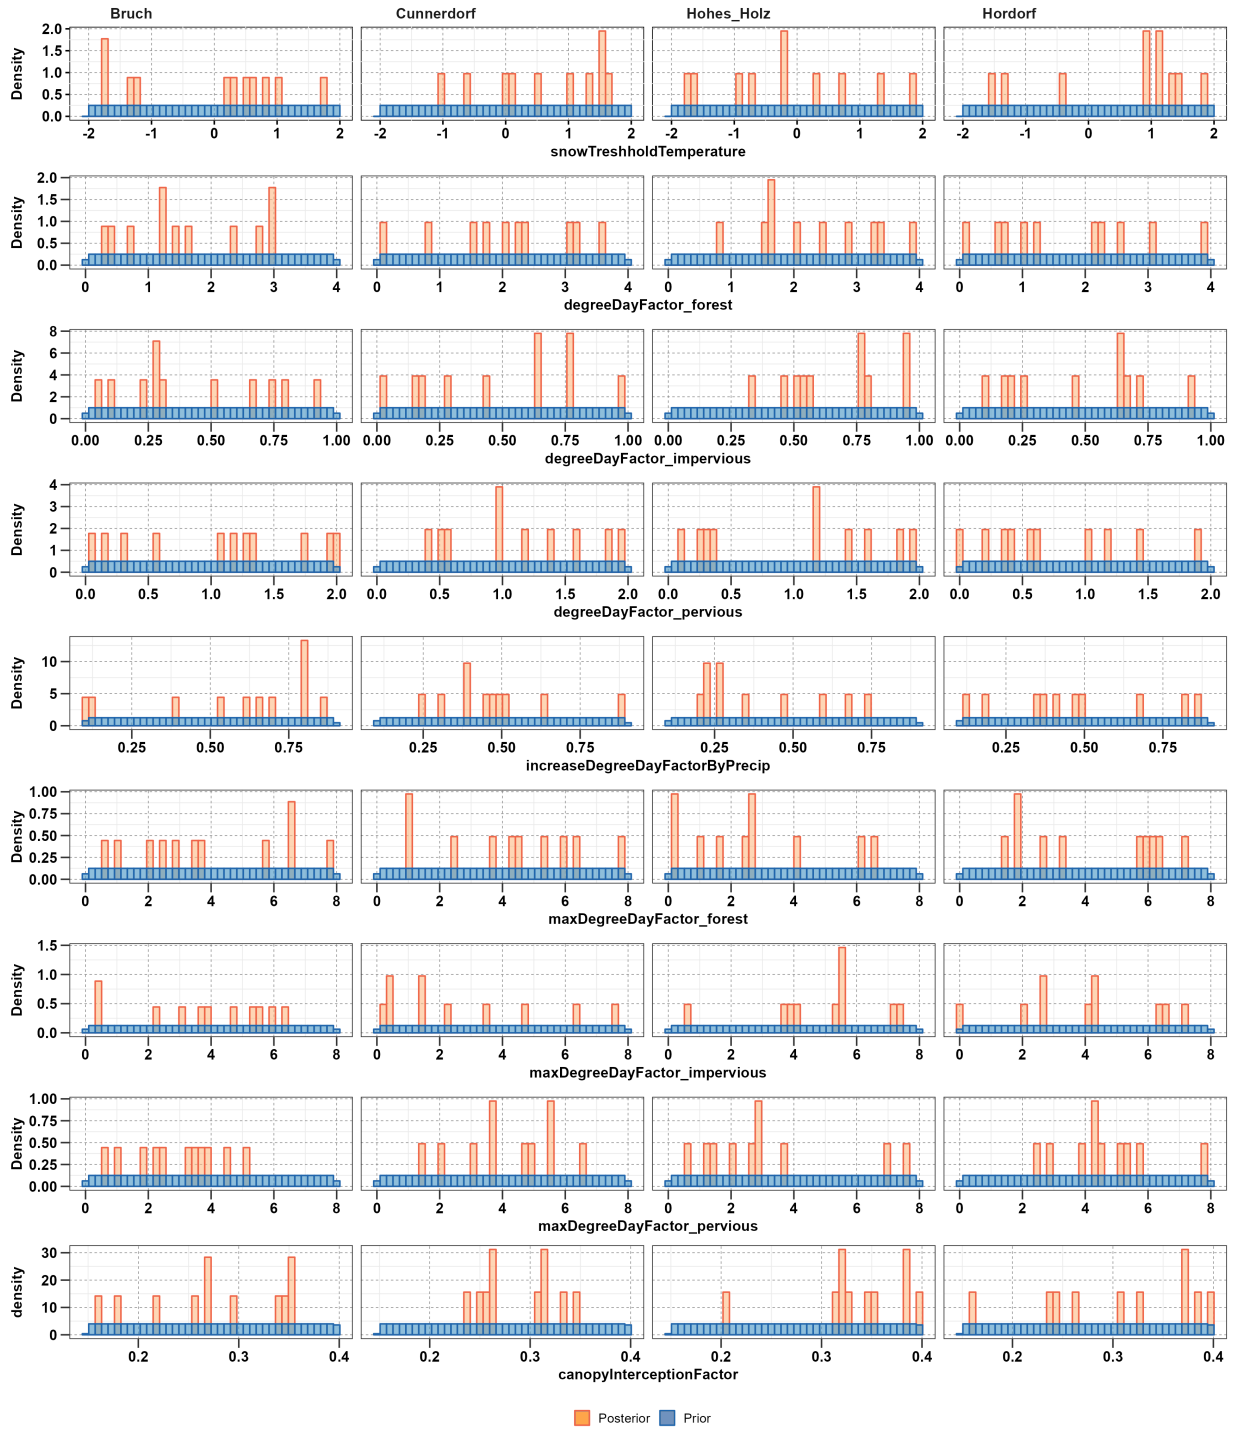

**Figure S6.** Probability Density Function (PDF) for nine parameters(snow module) of the mHM taken from the three methods, namely  $N_{Des,U}$ ,  $N_{Des,W}$  and  $N_{COSMIC}$ (see Table 4). The prior PDF of the original sample, consisting of LHS 100 000 data points, is represented by the blue color. The behavioral PDF LHS 10, obtained after applying the objective function, is shown in orange for four sites.

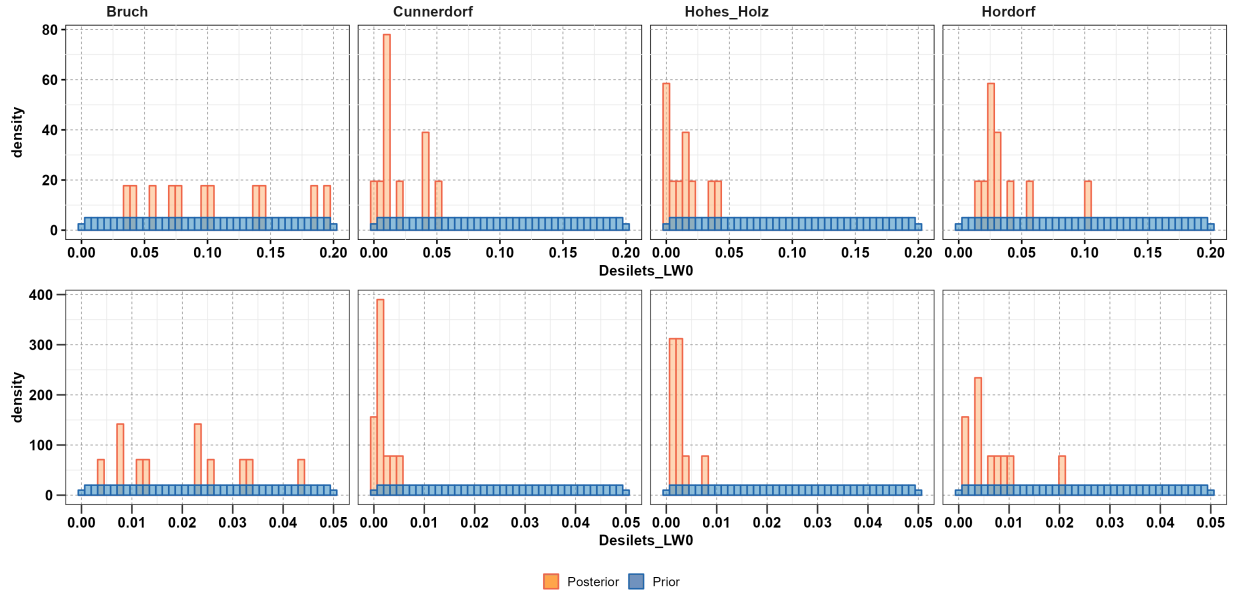

**Figure S7.** Probability Density Function (PDF) for six parameters (neutron module) of the mHM taken from the three methods, namely  $N_{Des,U}$ ,  $N_{Des,W}$  and  $N_{COSMIC}$  (see Table 4). The prior PDF of the original sample, consisting of LHS 100 000 data points, is represented by the blue color. The behavioral PDF LHS 10, obtained after applying the objective function, is shown in orange for four sites.

**Table S1.** Site-specific values for lattice water content ( $\text{cm}^3\text{cm}^{-3}$ ), mean bulk density ( $\text{g cm}^{-3}$ ), and  $L_3$  ( $\text{g cm}^{-2}$ ) are provided based on the best parameters obtained from three calibration methods ( $N_{Des,U}$ ,  $N_{Des,W}$ , and  $N_{COSMIC}$ ) across four different sites.

| Sites                                         |               | <i>Grosses Bruch</i> |             |             |              | <i>Hohes Holz</i> |             |             |              | <i>Hordorf</i> |             |             |              | <i>Cunnersdorf</i> |             |             |              |
|-----------------------------------------------|---------------|----------------------|-------------|-------------|--------------|-------------------|-------------|-------------|--------------|----------------|-------------|-------------|--------------|--------------------|-------------|-------------|--------------|
|                                               |               | Observed             | $N_{Des,U}$ | $N_{Des,W}$ | $N_{COSMIC}$ | Observed          | $N_{Des,U}$ | $N_{Des,W}$ | $N_{COSMIC}$ | Observed       | $N_{Des,U}$ | $N_{Des,W}$ | $N_{COSMIC}$ | Observed           | $N_{Des,U}$ | $N_{Des,W}$ | $N_{COSMIC}$ |
| Mean Bulk density ( $\text{gcm}^{-3}$ )       | $\rho$        | 1.176                | 1.243       | 1.39        | 1.32         | 1.136             | 1.08        | 1.125       | 0.81         | 1.278          | 1.26        | 1.26        | 1.149        | 1.491              | 1.26        | 1.33        | 1.26         |
| Lattice Water ( $\text{cm}^3\text{cm}^{-3}$ ) | $\theta_{lw}$ | 0.048                | 0.006       | 0.048       | 0.0461       | 0.038             | 0.0017      | 0.0057      | 0.027        | 0.043          | 0.028       | 0.043       | 0.033        | 0.030              | 0.0046      | 0.0025      | 0.0293       |
| $L_3$ ( $\text{g cm}^{-2}$ )                  | $L_3$         | –                    | –           | –           | 204.57       | –                 | –           | –           | 116.5        | –              | –           | –           | 366.8        | –                  | –           | –           | 642.9        |



**Table S2.** Description of the mHM model parameters ranges used in this study.

| <b>Parameter</b>                | <b>Description</b>                                                           | <b>Prior Range</b> |
|---------------------------------|------------------------------------------------------------------------------|--------------------|
| <b>Interception</b>             |                                                                              |                    |
| canintfact                      | canopyInterceptionFactor                                                     | 0.15-0.4           |
| <b>Snow</b>                     |                                                                              |                    |
| tsnow                           | Threshold temperature for snow/rain (°C)                                     | -2.0-2.0           |
| degreeDayFactor_forest          |                                                                              | 0.0001-4.0         |
| degreeDayFactor_impervious      |                                                                              | 0.00-1.0           |
| degreeDayFactor_pervious        |                                                                              | 0.0-2.0            |
| increaseDegreeDayFactorByPrecip | degree-day factor per unit of precip (mm day <sup>1</sup> °C <sup>-1</sup> ) | 0.1-0.9            |
| maxDegreeDayFactor_forest       |                                                                              | 0.0-8.0            |
| maxDegreeDayFactor_impervious   |                                                                              | 0.0-8.0            |
| maxDegreeDayFactor_pervious     |                                                                              | 0.0-8.0            |
| <b>Soil moisture</b>            |                                                                              |                    |
| orgmatforest                    | Organic matter content for forest                                            | 5.0-10.0           |
| orgmatimper                     | Organic matter content for impervious zone                                   | 0.0-1.0            |
| orgmatperv                      | Organic matter content for pervious zone                                     | 1.0-5.0            |
| ptflowconst                     | ptf saturated water content: constant                                        | 0.75-0.8           |
| ptflowclay                      | ptf saturated water content: coefficient clay content                        | 0.0008-0.0012      |
| ptflowdb                        | ptf saturated water content: coefficient bulk density                        | -0.27 - -0.25      |
| ptfhighconst                    | ptf saturated water content: constant                                        | 0.8-0.9            |
| ptfhighclay                     | Coefficient for clay content in pedo-transfer function                       | -0.35-0.30         |
| ptfhighdb                       | Coefficient for bulk density in pedo-transfer function for soils             | -0.0012-0.00080    |
| ptfksconst                      | Constant in pedo-transfer function for hydraulic conductivity of soils       | -1.200-0.285       |
| ptfkssand                       | ptf hydraulic conductivity: coefficient sand content                         | 0.006-0.026        |
| ptfksclay                       | ptf hydraulic conductivity: coefficient clay content                         | 0.003-0.013        |
| ptfksslp                        | Coefficient for slope in pedo-transfer function                              | 60.96 - 60.96      |
| rotfcoffore                     | Root fraction for forest areas                                               | 0.9- 0.999         |
| rotfcofimperv                   |                                                                              | 0.9-0.095          |
| rotfcofpervi                    | Threshold for                                                                | 0.001-0.090        |
| infshapef                       | Infiltration shape factor                                                    | 1.0 - 4.0          |
| <b>neutron counts</b>           |                                                                              |                    |
| N <sub>0(Des)</sub>             | neutron intensity over dry soil under the same conditions (cph)              | 600 - 1500         |
| Desliets <sub>lw0</sub>         | lattice water content $gg^{-1}$                                              | 0.0-0.2            |
| Desliets <sub>lw1</sub>         | lattice water content $gg^{-1}$                                              | 0.0-0.05           |
| N <sub>0(COSMIC)</sub>          | neutron intensity over dry soil under the same conditions (cph)              | 100-400            |
| COSMIC <sub>L30</sub>           | calculated using mean soil bulk density g cm <sup>-2</sup>                   | 20.0-500.0         |
| COSMIC <sub>L31</sub>           | calculated using mean soil bulk density g cm <sup>-2</sup>                   | -120.0-200.0       |
| COSMIC <sub>lw0</sub>           | lattice water content $gg^{-1}$                                              | 0.0-0.20           |
| COSMIC <sub>lw1</sub>           | lattice water content $gg^{-1}$                                              | 0.0-0.05           |

**Table S3.** Description of the best parameter values in mHM for each site and methods i.e., *Grosses Bruch, Hohes Holz, Hordorf, and Cunnorsdorf*. To better assist the user we keep the model nomenclature name the same as that is there in the model code mHM.

| Parameters             | <i>Grosses Bruch</i> |              |              | <i>Hohes Holz</i> |              |              | <i>Hordorf</i> |              |              | <i>Cunnorsdorf</i> |              |              |
|------------------------|----------------------|--------------|--------------|-------------------|--------------|--------------|----------------|--------------|--------------|--------------------|--------------|--------------|
|                        | $N_{Des,U}$          | $N_{Des,W}$  | $N_{COSMIC}$ | $N_{Des,U}$       | $N_{Des,W}$  | $N_{COSMIC}$ | $N_{Des,U}$    | $N_{Des,W}$  | $N_{COSMIC}$ | $N_{Des,U}$        | $N_{Des,W}$  | $N_{COSMIC}$ |
| <b>Interception</b>    |                      |              |              |                   |              |              |                |              |              |                    |              |              |
| caninfect              | 0.26963375           | 0.39467625   | 0.27247125   | 0.38314375        | 0.28744375   | 0.17899125   | 0.38668875     | 0.24691125   | 0.33618375   | 0.26136875         | 0.39274875   | 0.20255125   |
| <b>Snow</b>            |                      |              |              |                   |              |              |                |              |              |                    |              |              |
| tsnow                  | -1.72058             | -0.24602     | -0.07114     | -0.90398          | -1.27014     | -1.98074     | -1.50122       | -1.80374     | 0.92082      | 1.35414            | -1.8023      | 0.62986      |
| DDF_forest             | 1.181170473          | 2.362260945  | 1.427604312  | 1.640758983       | 3.659028525  | 3.598350042  | 1.0360941      | 2.687172822  | 2.924166897  | 2.257903554        | 1.513002177  | 2.365420866  |
| DDF_impervious         | 0.231765             | 0.984535     | 0.554015     | 0.767975          | 0.802375     | 0.843145     | 0.650345       | 0.442805     | 0.445115     | 0.763965           | 0.714765     | 0.638455     |
| DDF_pervious           | 1.98081              | 0.70283      | 0.35491      | 0.31141           | 1.94923      | 0.04935      | 0.40997        | 0.11735      | 1.61139      | 1.84961            | 0.11505      | 1.40673      |
| increaseDDFByPrecip    | 0.801436             | 0.519148     | 0.405388     | 0.275668          | 0.277572     | 0.508308     | 0.49598        | 0.437388     | 0.312116     | 0.640156           | 0.3651       | 0.271764     |
| maxDDF_forest          | 2.5606               | 3.65044      | 3.79716      | 2.69636           | 6.86284      | 2.88204      | 6.09524        | 5.83868      | 6.685        | 5.30796            | 2.22876      | 7.5542       |
| maxDDF_impervious      | 5.54556              | 1.67764      | 0.4466       | 4.18084           | 5.22028      | 4.9406       | 2.1406         | 7.40588      | 3.3662       | 3.5006             | 2.705        | 1.63236      |
| maxDDF_pervious        | 2.25852              | 0.91556      | 3.09588      | 3.67436           | 7.2938       | 3.92884      | 2.87644        | 4.14396      | 0.30396      | 6.49708            | 6.73188      | 5.09484      |
| <b>Soil moisture</b>   |                      |              |              |                   |              |              |                |              |              |                    |              |              |
| orgmatforest           | 7.920325             | 8.546725     | 8.149575     | 6.742125          | 5.108675     | 7.725625     | 6.102525       | 6.936725     | 8.819175     | 9.170475           | 9.270475     | 5.363775     |
| orgmatimper            | 0.253925             | 0.619025     | 0.261195     | 0.835905          | 0.659235     | 0.196675     | 0.489835       | 0.853425     | 0.529195     | 0.154815           | 0.343535     | 0.589065     |
| orgmatperv             | 4.9017               | 1.16946      | 1.09146      | 1.3969            | 1.14262      | 4.20494      | 1.11418        | 1.10058      | 2.11426      | 2.99006            | 1.27978      | 1.02526      |
| ptflowconst            | 0.77919125           | 0.75686675   | 0.76741925   | 0.75156525        | 0.77374225   | 0.79731425   | 0.76049825     | 0.75274975   | 0.75735525   | 0.75352225         | 0.76110875   | 0.75536025   |
| ptflowclay             | 0.000954942          | 0.001031974  | 0.000856918  | 0.001102182       | 0.001130958  | 0.00088389   | 0.000929002    | 0.000865138  | 0.000822562  | 0.000865258        | 0.000809874  | 0.001190426  |
| ptflowdb               | -0.2558197           | -0.2556907   | -0.2623517   | -0.2685499        | -0.2686231   | -0.2519565   | -0.2673095     | -0.2660045   | -0.2542747   | -0.2689919         | -0.2680209   | -0.2616759   |
| ptfhighconst           | 0.8113785            | 0.8554075    | 0.8281195    | 0.8754505         | 0.8345925    | 0.8587685    | 0.8954385      | 0.8777155    | 0.8175895    | 0.8988685          | 0.8921375    | 0.8971475    |
| ptfhighclay            | -0.000817446         | -0.000983926 | -0.000935938 | -0.000872634      | -0.00084891  | -0.000915346 | -0.000870074   | -0.001023514 | -0.00118727  | -0.000922102       | -0.001042454 | -0.00084843  |
| ptfhighdb              | -0.31753025          | -0.32982925  | -0.30609325  | -0.31914975       | -0.33722325  | -0.31565925  | -0.30634375    | -0.31458025  | -0.33416625  | -0.30712125        | -0.34471675  | -0.30714625  |
| ptfksconst             | -0.837774375         | -1.041865125 | -0.766367775 | -0.394173225      | -0.773385825 | -0.488665275 | -0.590413275   | -0.681995625 | -0.625192425 | -0.421851975       | -0.412345125 | -0.372432825 |
| ptfkssand              | 0.0104653            | 0.0202651    | 0.0164579    | 0.0132421         | 0.0089341    | 0.0167191    | 0.0226337      | 0.0149783    | 0.0210209    | 0.0245547          | 0.0183797    | 0.0082893    |
| ptfkscay               | 0.01272895           | 0.00321305   | 0.00582305   | 0.00967325        | 0.01108895   | 0.00506275   | 0.01157005     | 0.01098215   | 0.00754655   | 0.00596215         | 0.00332055   | 0.01272805   |
| ptfksslp               | 60.96                | 60.96        | 60.96        | 60.96             | 60.96        | 60.96        | 60.96          | 60.96        | 60.96        | 60.96              | 60.96        | 60.96        |
| rotfcoffore            | 0.998641125          | 0.994367295  | 0.998943075  | 0.935941455       | 0.907272045  | 0.972914985  | 0.958884705    | 0.953256555  | 0.997679835  | 0.968378805        | 0.962550675  | 0.991738845  |
| rotfcofimperv          | 0.94968525           | 0.92632575   | 0.92657825   | 0.90099175        | 0.90925125   | 0.92889275   | 0.91826025     | 0.94530775   | 0.92371575   | 0.93860525         | 0.92961175   | 0.91830075   |
| rotfcofpervi           | 0.010300055          | 0.001555805  | 0.001060075  | 0.059349735       | 0.038747125  | 0.063506035  | 0.013406155    | 0.068419725  | 0.001527325  | 0.012726195        | 0.040447025  | 0.001202475  |
| infshapef              | 2.859955             | 2.516215     | 2.773645     | 1.792765          | 1.383535     | 3.322555     | 2.482105       | 1.123555     | 1.105975     | 1.007065           | 1.581325     | 3.708625     |
| <b>neutron counts</b>  |                      |              |              |                   |              |              |                |              |              |                    |              |              |
| Desliet <sub>sw0</sub> | 0.034847             | 0.109691     |              | 0.000731          | 0.024589     |              | 0.031221       | 0.039585     |              | 0.018199           | 0.010511     |              |
| Desliet <sub>sw1</sub> | 0.00342175           | 0.03951425   |              | 0.00161625        | 0.00205875   |              | 0.02101825     | 0.03462075   |              | 0.00155525         | 0.00125075   |              |
| COSMIC <sub>L30</sub>  |                      |              | 205.198375   |                   |              | 243.065375   |                |              | 344.667875   |                    |              | 488.996625   |
| COSMIC <sub>L31</sub>  |                      |              | 65.0795      |                   |              | 81.6965      |                |              | 29.3465      |                    |              | -26.5405     |
| COSMIC <sub>tw0</sub>  |                      |              | 0.100185     |                   |              | 0.087727     |                |              | 0.094789     |                    |              | 0.083819     |
| COSMIC <sub>tw1</sub>  |                      |              | 0.04364675   |                   |              | 0.01504775   |                |              | 0.01345875   |                    |              | 0.01718075   |
